# Supplementary material for: Zam Is a Redox-Regulated Member of the RNB-Family Required for Optimal Photosynthesis in Cyanobacteria
Source: Microorganisms. 2022 May 20;10(5):1055. doi: 10.3390/microorganisms10051055 (PMC9145284; doi:10.3390/microorganisms10051055)
Supplement: Supplementary file 1 [file microorganisms-10-01055-s001.zip › Table S1.pdf]

**Table S1.** Taxid and reference IDs for organisms and sequences used in this study.

| <b>Organism</b>                                             | <b>Type</b>   | <b>Taxid ID</b> | <b>PCC 7002 Zam<br/>(WP_012307157.1)<br/>Homolog ID</b> | <b>PCC 7002 Rnb<br/>(WP_012306205.1)<br/>Homolog ID</b> |
|-------------------------------------------------------------|---------------|-----------------|---------------------------------------------------------|---------------------------------------------------------|
| <i>Acaryochloris mariana</i><br>MBIC11017                   | Cyanobacteria | 329726          | WP_012164530                                            | WP_012165064                                            |
| <i>Anabaena</i> sp. PCC 7120                                | Cyanobacteria | 103690          | WP_096637251                                            | WP_010998583                                            |
| <i>Arthrospira platensis</i><br>NIES-69                     | Cyanobacteria | 696747          | WP_006616719                                            | WP_035737129                                            |
| <i>Cyanobacterium</i> sp.<br>UCYN-A                         | Cyanobacteria | 713887          | WP_041487771                                            | WP_012954168                                            |
| <i>Cyanothece</i> sp. BH68                                  | Cyanobacteria | 43989           | WP_009543092                                            | WP_009545481                                            |
| <i>Gleobacter violaceus</i><br>PCC 7421                     | Cyanobacteria | 251221          | WP_011141448                                            | WP_011141615                                            |
| <i>Micryocystis aeruginosa</i><br>NIES-843                  | Cyanobacteria | 449447          | WP_012265538                                            | WP_012267238                                            |
| <i>Prochlorococcus Marinus</i><br><i>pastoris</i> CCMP 1986 | Cyanobacteria | 59919           | WP_011132481                                            | WP_011132502                                            |
| <i>Synechococcus elongatus</i><br>PCC 7942                  | Cyanobacteria | 1140            | WP_011378237                                            | WP_011242737                                            |
| <i>Synechocystis</i> sp.<br>PCC 6803                        | Cyanobacteria | 1148            | WP_010871910                                            | WP_010871832                                            |
| <i>Thermosynechococcus</i><br><i>elongatus</i> BP-1         | Cyanobacteria | 197221          | WP_011057710                                            | WP_011056499                                            |
| <i>Trichodesmium erythraeum</i><br>IMS101                   | Cyanobacteria | 203124          | WP_011611172                                            | WP_011613117                                            |
| <i>Epithemia turgida</i><br>endosymbiont                    | Diatom        | 718217          | WP_044107244                                            | WP_044107596                                            |
| <i>Paulinella chromatophora</i>                             | Amoeba        | 39717           | YP_002049468                                            | YP_002048710                                            |
| <i>Chlamydomonas reinhardtii</i><br>(nuclear)               | Algae         | 3055            | None                                                    | XP_001693304                                            |
| <i>Chlamydomonas reinhardtii</i><br>(chloroplastic)         | Algae         | 3055            | None                                                    | ABO20871.2                                              |
