# Supplementary material for: Zam Is a Redox-Regulated Member of the RNB-Family Required for Optimal Photosynthesis in Cyanobacteria
Source: Microorganisms. 2022 May 20;10(5):1055. doi: 10.3390/microorganisms10051055 (PMC9145284; doi:10.3390/microorganisms10051055)
Supplement: Supplementary file 1 [file microorganisms-10-01055-s001.zip › Table S2.pdf]

**Table S2.** Strains used in this study.

| Name                   | Number   | Description                                  | Resistance    | Reference    |
|------------------------|----------|----------------------------------------------|---------------|--------------|
| WT                     | -        | Wild-type <i>Synechococcus</i> sp. PCC 7002  | -             | -            |
| WT GFP                 |          | WT cells transformed by EBJc0025             | Gentamicin    | This Work    |
| $\Delta Z$             | scJC0122 | WT cells transformed by pJCC0254             | Spectinomycin | Cameron 2015 |
| $\Delta Z+$            | scJC0254 | $\Delta Z$ cells transformed with pJCC257    | Kanamycin     | Cameron 2015 |
| $\Delta Z+$ C73S       | -        | $\Delta Z$ cells transformed with pPET046    | Kanamycin     | This Work    |
| $\Delta Z+$ C79S       | -        | $\Delta Z$ cells transformed with pPET047    | Kanamycin     | This Work    |
| $\Delta Z+$ DCS        | -        | $\Delta Z$ cells transformed with pPET048    | Kanamycin     | This Work    |
| MBP-Zam-His Expression | sJC0482  | <i>E. coli</i> BL21 transformed with pPET095 | Kanamycin     | This Work    |
