# Supplementary material for: Zam Is a Redox-Regulated Member of the RNB-Family Required for Optimal Photosynthesis in Cyanobacteria
Source: Microorganisms. 2022 May 20;10(5):1055. doi: 10.3390/microorganisms10051055 (PMC9145284; doi:10.3390/microorganisms10051055)
Supplement: Supplementary file 1 [file microorganisms-10-01055-s001.zip › Table S3.pdf]

**Table S3.** Plasmids used in this study.

| Number   | Description                                        | Genomic Location | Reference               |
|----------|----------------------------------------------------|------------------|-------------------------|
| pJCC0254 | pUC19- $\Delta$ glpK:KmR-A1543                     | <i>zam</i>       | Cameron et al. 2015 [7] |
| pJCC0257 | pUC19- $\Delta$ glpK:KmR- <i>zam</i>               | <i>glpK</i>      | Cameron et al. 2015 [7] |
| pPET046  | pUC19- $\Delta$ glpK:KmR- <i>zam</i> ; C73G        | <i>glpK</i>      | This Work               |
| pPET047  | pUC19- $\Delta$ glpK:KmR- <i>zam</i> ; C79G        | <i>glpK</i>      | This Work               |
| pPET048  | pUC19- $\Delta$ glpK:KmR- <i>zam</i> ; C73G & C79R | <i>glpK</i>      | This Work               |
| EBJc0025 | pUC19- $\Delta$ glpK:GmR_P <sub>ccmK2</sub> -sfGFP | <i>glpK</i>      | This Work               |
| pPET095  | pET28B MBP-Zam-6xHIS                               | -                | This Work               |
