# Supplementary material for: Zam Is a Redox-Regulated Member of the RNB-Family Required for Optimal Photosynthesis in Cyanobacteria
Source: Microorganisms. 2022 May 20;10(5):1055. doi: 10.3390/microorganisms10051055 (PMC9145284; doi:10.3390/microorganisms10051055)
Supplement: Supplementary file 1 [file microorganisms-10-01055-s001.zip › Table S4.pdf]

**Table S4.** DNA oligonucleotides used in this study.

| Number   | Description                               | Sequence 5' -> 3'                           | Reference |
|----------|-------------------------------------------|---------------------------------------------|-----------|
| PET_103F | A1543 internal primer for sequencing      | ggggtgaggtgaatttcacctc                      | This Work |
| PET_104R | A1543 internal primer for sequencing      | gatttactgcgccaatttcccg                      | This Work |
| PET_105F | A1543 internal primer for sequencing      | gagttttaaatgcgctgcatcacc                    | This Work |
| PET_106R | A1543 internal primer for sequencing      | gacggacatgacaaagatcctgaactatc               | This Work |
| PET_107F | A1543 Upstream Flanking Region            | catcagctgagtcatagacgggtg                    | This Work |
| PET_108R | A1543 Downstream Flanking Region          | gtttcactttactttctaacgaaaaggatagtttgc        | This Work |
| PET_109F | A1543 C73F Mutation Primer Forward        | caaaacagaaacccttactcgaacccgtagctttgcctcgacc | This Work |
| PET_110R | A1543 C73F Mutation Primer Reverse        | tacggggttcgagtaagggtttctgttttgcg            | This Work |
| PET_111F | A1543 C79G Mutation Primer Forward        | caaaaccgaaacccttactcgaacaccgtagc            | This Work |
| PET_112R | A1543 C79G Mutation Primer Reverse        | tacggtgttcgagtaagggttcggttttgcgatccaggattc  | This Work |
| PET_114R | A1543 C73G & C79G Mutation Primer Reverse | tacggggttcgagtaagggttcggttttgcgatccaggattc  | This Work |
| PET_115F | A1543 C73G & C79G Mutation Primer Reverse | caaaaccgaaacccttactcgaacccgtagctttgcctcgacc | This Work |
